# Supplementary material for: Identification of Promising Drug Candidates against Prostate Cancer through Computationally-Driven Drug Repurposing
Source: MDPI journal article supplement (doi:10.3390/ijms24043135), 2023-02-05
Supplement: s1 [file s1]

# “Identification of promising drug candidates against prostate cancer through computationally-driven drug repurposing”

Leonardo Bernal,<sup>1,2</sup> Luca Pinzi,<sup>1</sup> Giulio Rastelli<sup>1\*</sup>

<sup>1</sup> Department of Life Sciences, University of Modena and Reggio Emilia, Via Giuseppe Campi 103, 41125 Modena, Italy.

<sup>2</sup> Clinical and Experimental Medicine PhD Program, University of Modena and Reggio Emilia, Modena, Italy.

**\* Correspondence to:** Prof. Giulio Rastelli, Department of Life Sciences, University of Modena and Reggio Emilia, Via Giuseppe Campi 103, 41125 Modena, Italy. Tel +39 059 2058564, Email [giulio.rastelli@unimore.it](mailto:giulio.rastelli@unimore.it)

Table of contents – supporting information

**Tables**

Table S1 ..... 3

Table S2 ..... 4

Table S3 ..... 5

Table S4 ..... 7

Table S5 ..... 9

Table S6 ..... 14

Table S7 ..... 16

Table S8 ..... 22

**Figures**

Figure S1 ..... 23

Figure S2 ..... 24

Figure S3 ..... 25

Figure S4 ..... 26

Figure S5 ..... 27

**Table S1.** Number of molecules with activity records on PC cell lines retrieved from ChEMBL, before and after the filtration process.

|                         | <i>PC-3</i>  | <i>DU-145</i> | <i>LNCaP</i> | <i>Vcap</i> | <i>LNCaP<br/>clone FGC</i> | <i>22Rv1</i> | <i>LAPC4</i> | <i>PWR-1E</i> | <i>RWPE-1</i> |
|-------------------------|--------------|---------------|--------------|-------------|----------------------------|--------------|--------------|---------------|---------------|
| <i>Starting dataset</i> | <b>67207</b> | <b>52325</b>  | <b>10159</b> | <b>785</b>  | <b>192</b>                 | <b>122</b>   | <b>300</b>   | <b>39</b>     | <b>474</b>    |
| <i>IC<sub>50</sub></i>  | 15973        | 8882          | 4314         | 372         | 164                        | 112          | 35           | 22            | 353           |
| <i>EC<sub>50</sub></i>  | 558          | 223           | 215          | 0           | 8                          | 0            | 0            | 0             | 0             |
| <i>GI<sub>50</sub></i>  | 32173        | 33696         | 342          | 41          | 2                          | 0            | 7            | 0             | 32            |
| <i>After filtration</i> | <b>44014</b> | <b>40387</b>  | <b>3610</b>  | <b>377</b>  | <b>140</b>                 | <b>91</b>    | <b>26</b>    | <b>16</b>     | <b>2</b>      |
| <i>IC<sub>50</sub></i>  | 12437        | 7711          | 3195         | 340         | 140                        | 91           | 19           | 16            | 2             |
| <i>EC<sub>50</sub></i>  | 404          | 177           | 100          | 0           | 0                          | 0            | 0            | 0             | 0             |
| <i>GI<sub>50</sub></i>  | 31173        | 32499         | 315          | 37          | 0                          | 0            | 7            | 0             | 0             |

**Table S2.** Number of molecules tested on PC cells, classified according to the activity type and value. In particular, the compounds were classified as: i) “*highly active*” (HA) when their activity values is lower or equal to 1  $\mu$ M; ii) “*scarcely active*” molecules (SA) when their activity values is higher than 1  $\mu$ M, and lower or equal to 10  $\mu$ M, and; iii) inactive molecules (INA) when their activity values is higher than 10  $\mu$ M.

|                                 | <i>IC<sub>50</sub></i> |           |            | <i>EC<sub>50</sub></i> |           |            | <i>GI<sub>50</sub></i> |           |            |
|---------------------------------|------------------------|-----------|------------|------------------------|-----------|------------|------------------------|-----------|------------|
|                                 | <i>HA</i>              | <i>SA</i> | <i>INA</i> | <i>HA</i>              | <i>SA</i> | <i>INA</i> | <i>HA</i>              | <i>SA</i> | <i>INA</i> |
| <i>PC-3</i>                     | 2083                   | 3703      | 6651       | 148                    | 124       | 132        | 2626                   | 5891      | 22656      |
| <i>DU-145</i>                   | 1202                   | 2352      | 4157       | 18                     | 62        | 97         | 3224                   | 6317      | 22958      |
| <i>LNCaP</i>                    | 956                    | 1060      | 1179       | 11                     | 24        | 65         | 102                    | 121       | 92         |
| <i>Vcap</i>                     | 46                     | 118       | 176        | 0                      | 0         | 0          | 10                     | 3         | 24         |
| <i>LNCaPc<br/>clone<br/>FGC</i> | 50                     | 35        | 55         | 0                      | 0         | 0          | 0                      | 0         | 0          |
| <i>22Rv1</i>                    | 25                     | 28        | 38         | 0                      | 0         | 0          | 0                      | 0         | 0          |
| <i>LAPC4</i>                    | 10                     | 8         | 1          | 0                      | 0         | 0          | 0                      | 0         | 7          |
| <i>PWR-1E</i>                   | 15                     | 1         | 0          | 0                      | 0         | 0          | 0                      | 0         | 0          |
| <i>RWPE-1</i>                   | 1                      | 1         | 0          | 0                      | 0         | 0          | 0                      | 0         | 0          |

**Table S3.** All targets that emerged from the analysis of activity annotations of ligands with PC-3, DU-145, and LNCaP cell-based activity data reported in ChEMBL. The targets with significant Spearman's Rho coefficient of correlation ( $\rho_s \geq 0.4$ , p-value < 0.001) are highlighted in bold.

| Target Name                                                  | Protein family                                                                             | Target ChEMBL ID  | Uniprot ID * | Cell lines                 |
|--------------------------------------------------------------|--------------------------------------------------------------------------------------------|-------------------|--------------|----------------------------|
| Serine/threonine-protein kinase PIM1                         | Protein kinase superfamily, CAMK Ser/Thr protein kinase family, PIM subfamily              | CHEMBL2147        | PIM1         | PC-3                       |
| PI3-kinase p110-alpha subunit                                | PI3/PI4-kinase family                                                                      | CHEMBL4005        | PK3CA        | PC-3                       |
| Tyrosine-protein kinase LCK                                  | Protein kinase superfamily, Tyr protein kinase family, SRC subfamily                       | CHEMBL258         | LCK          | PC-3                       |
| Glycogen synthase kinase-3 beta                              | Protein kinase superfamily, CMGC Ser/Thr protein kinase family, GSK-3 subfamily            | CHEMBL262         | GSK3B        | PC-3                       |
| Cyclin-dependent kinase 2                                    | Protein kinase superfamily, CMGC Ser/Thr protein kinase family, CDC2/CDKX subfamily        | CHEMBL301         | CDK2         | PC-3; DU-145               |
| <b>Cyclin-dependent kinase 1</b>                             | <b>Protein kinase superfamily, CMGC Ser/Thr protein kinase family, CDC2/CDKX subfamily</b> | <b>CHEMBL308</b>  | <b>CDK1</b>  | <b>PC-3; DU-145</b>        |
| Serine/threonine-protein kinase AKT2                         | Protein kinase superfamily, AGC Ser/Thr protein kinase family, RAC subfamily               | CHEMBL2431        | AKT2         | PC-3                       |
| Serine/threonine-protein kinase TAO1                         | Protein kinase superfamily, STE Ser/Thr protein kinase family, STE20 subfamily             | CHEMBL5261        | TAOK1        | PC-3                       |
| Serine/threonine-protein kinase D2                           | Protein kinase superfamily, CAMK Ser/Thr protein kinase family, PKD subfamily              | CHEMBL4900        | KPCD2        | PC-3                       |
| Dual specificity mitogen-activated protein kinase kinase 5   | Protein kinase superfamily, STE Ser/Thr protein kinase family, MAP kinase kinase subfamily | CHEMBL4948        | MP2K5        | PC-3                       |
| PI3-kinase p110-delta subunit                                | PI3/PI4-kinase family                                                                      | CHEMBL3130        | PK3CD        | PC-3                       |
| PI3-kinase p110-beta subunit                                 | PI3/PI4-kinase family                                                                      | CHEMBL3145        | PK3CB        | PC-3                       |
| <b>PI3-kinase p110-gamma subunit</b>                         | <b>PI3/PI4-kinase family</b>                                                               | <b>CHEMBL3267</b> | <b>PK3CG</b> | <b>PC-3</b>                |
| <b>Serine/threonine-protein kinase mTOR</b>                  | <b>PI3/PI4-kinase family</b>                                                               | <b>CHEMBL2842</b> | <b>MTOR</b>  | <b>PC-3</b>                |
| MAP kinase p38 alpha                                         | Protein kinase superfamily, CMGC Ser/Thr protein kinase family, MAP kinase subfamily       | CHEMBL260         | MK14         | PC-3                       |
| <b>Histone deacetylase 1</b>                                 | <b>Histone deacetylase family, HD type 1 subfamily</b>                                     | <b>CHEMBL325</b>  | <b>HDAC1</b> | <b>PC-3; DU-145; LNCaP</b> |
| Histone deacetylase 10                                       | Histone deacetylase family, HD type 2 subfamily                                            | CHEMBL5103        | HDA10        | PC-3                       |
| Histone deacetylase 8                                        | Histone deacetylase family, HD type 1 subfamily                                            | CHEMBL3192        | HDAC8        | PC-3                       |
| <b>Histone deacetylase 4</b>                                 | <b>Histone deacetylase family, HD type 2 subfamily</b>                                     | <b>CHEMBL3524</b> | <b>HDAC4</b> | <b>PC-3</b>                |
| Histone deacetylase 5                                        | Histone deacetylase family, HD type 2 subfamily                                            | CHEMBL2563        | HDAC5        | PC-3                       |
| DNA topoisomerase II alpha                                   | Type II topoisomerase family                                                               | CHEMBL1806        | TOP2A        | PC-3; DU-145               |
| Proteasome Macropain subunit MB1                             | Peptidase T1B family                                                                       | CHEMBL4662        | PSB5         | PC-3                       |
| Proteasome Macropain subunit                                 | Peptidase T1B family                                                                       | CHEMBL3492        | PSB2         | PC-3                       |
| Histone deacetylase 2                                        | Histone deacetylase family, HD type 1 subfamily                                            | CHEMBL1937        | HDAC2        | PC-3                       |
| Histone deacetylase 11                                       | Histone deacetylase family                                                                 | CHEMBL3310        | HDA11        | PC-3                       |
| Dihydrofolate reductase                                      | Dihydrofolate reductase family                                                             | CHEMBL202         | DYR          | PC-3; DU-145               |
| Androgen Receptor                                            | Nuclear hormone receptor family, NR3 subfamily                                             | CHEMBL1871        | ANDR         | PC-3                       |
| DNA topoisomerase I                                          | Type IB topoisomerase family                                                               | CHEMBL1781        | TOP1         | PC-3                       |
| <b>Heat shock protein HSP 90-alpha</b>                       | <b>Heat shock protein 90 family</b>                                                        | <b>CHEMBL3880</b> | <b>HS90A</b> | <b>PC-3</b>                |
| Alpha-1b adrenergic receptor                                 | G-protein coupled receptor 1 family, Adrenergic receptor subfamily, ADRA1B sub-subfamily   | CHEMBL232         | ADA1B        | PC-3                       |
| <b>Kinesin-like protein 11</b>                               | <b>TRAFAC class myosin-kinesin ATPase superfamily, Kinesin family, BimC subfamily</b>      | <b>CHEMBL4581</b> | <b>KIF11</b> | <b>PC-3</b>                |
| Nicotinamide phosphoribosyltransferase                       | NAPRTase family                                                                            | CHEMBL1744525     | NAMPT        | PC-3; DU-145               |
| Fatty acid synthase                                          |                                                                                            | CHEMBL4158        | FAS          | PC-3                       |
| <b>Voltage-gated T-type calcium channel alpha-1G subunit</b> | <b>Calcium channel alpha-1 subunit (TC 1A.1.11) family, CACNA1G subfamily</b>              | <b>CHEMBL4641</b> | <b>CAC1G</b> | <b>DU-145</b>              |
| Citron Rho-interacting kinase                                | Protein kinase superfamily, AGC Ser/Thr protein kinase family                              | CHEMBL5579        | CTRO         | DU-145                     |
| Signal transducer and activator of transcription 3           | Transcription factor STAT family                                                           | CHEMBL4026        | STAT3        | DU-145                     |
| Serine/threonine-protein kinase RIPK2                        | Protein kinase superfamily, TKL Ser/Thr protein kinase family                              | CHEMBL5014        | RIPK2        | DU-145                     |
| Vascular endothelial growth factor receptor 2                | Protein kinase superfamily, Tyr protein kinase family, CSF-1/PDGF receptor subfamily       | CHEMBL279         | VGFR2        | DU-145                     |

|                                                   |                                                                               |               |       |        |
|---------------------------------------------------|-------------------------------------------------------------------------------|---------------|-------|--------|
| 1-acylglycerol-3-phosphate O-acyltransferase beta | 1-acyl-sn-glycerol-3-phosphate acyltransferase family                         | CHEMBL4772    | PLCB  | DU-145 |
| Epidermal growth factor receptor erbB1            | Protein kinase superfamily, Tyr protein kinase family, EGF receptor subfamily | CHEMBL203     | EGFR  | DU-145 |
| Serine/threonine-protein kinase Aurora-A          | Protein kinase superfamily, Ser/Thr protein kinase family, Aurora subfamily   | CHEMBL4722    | AURKA | LNCaP  |
| Bromodomain-containing protein 4                  |                                                                               | CHEMBL1163125 | BRD4  | LNCaP  |

---

Note: \* the complete UniProt name of proteins includes also the suffix “\_HUMAN”.

**Table S4.** Spearman’s Rho correlation coefficient ( $\rho_s$ ) with confidence interval (CI) of the targets that emerged as relevant from the analysis of activity annotations of ligands with PC-3, DU-145, and LNCaP data in ChEMBL. The targets with an acceptable Spearman’s Rho coefficient ( $\rho_s \geq 0.4$ , p-value  $< 0.001$ ) are highlighted in bold.

[illegible]

|                                                              |              |      |          |     |      |      |             |                 |           |             |             |      |          |    |      |      |  |  |  |
|--------------------------------------------------------------|--------------|------|----------|-----|------|------|-------------|-----------------|-----------|-------------|-------------|------|----------|----|------|------|--|--|--|
| PI3-kinase p110-alpha subunit                                | PK3CA        | 0,46 | 2,93E-12 | 203 | 0,34 | 0,57 |             |                 |           |             |             |      |          |    |      |      |  |  |  |
| Tyrosine-protein kinase LCK                                  | LCK          | 0,44 | 1,07E-02 | 33  | 0,09 | 0,69 |             |                 |           |             |             |      |          |    |      |      |  |  |  |
| Histone deacetylase 10                                       | HDA10        | 0,42 | 3,40E-02 | 26  | 0,01 | 0,70 |             |                 |           |             |             |      |          |    |      |      |  |  |  |
| Histone deacetylase 8                                        | HDAC8        | 0,37 | 4,99E-04 | 87  | 0,16 | 0,54 |             |                 |           |             |             |      |          |    |      |      |  |  |  |
| <b>Voltage-gated T-type calcium channel alpha-1G subunit</b> | <b>CAC1G</b> |      |          |     |      |      | <b>0,93</b> | <b>3,97E-05</b> | <b>11</b> | <b>0,68</b> | <b>0,99</b> |      |          |    |      |      |  |  |  |
| Citron Rho-interacting kinase                                | CTRO         |      |          |     |      |      | 0,64        | 4,79E-02        | 10        | -0,08       | 0,92        |      |          |    |      |      |  |  |  |
| Signal transducer and activator of transcription 3           | STAT3        |      |          |     |      |      | 0,56        | 1,62E-02        | 18        | 0,08        | 0,83        |      |          |    |      |      |  |  |  |
| Serine/threonine-protein kinase RIPK2                        | RIPK2        |      |          |     |      |      | 0,55        | 4,16E-02        | 14        | -0,03       | 0,85        |      |          |    |      |      |  |  |  |
| Vascular endothelial growth factor receptor 2                | VGFR2        |      |          |     |      |      | 0,45        | 1,17E-03        | 50        | 0,18        | 0,65        |      |          |    |      |      |  |  |  |
| 1-acylglycerol-3-phosphate O-acyltransferase beta            | PLCB         |      |          |     |      |      | 0,41        | 4,24E-02        | 25        | -0,01       | 0,70        |      |          |    |      |      |  |  |  |
| Epidermal growth factor receptor erbB1                       | EGFR         |      |          |     |      |      | 0,39        | 1,05E-03        | 69        | 0,15        | 0,58        |      |          |    |      |      |  |  |  |
| Serine/threonine-protein kinase Aurora-A                     | AURKA        |      |          |     |      |      | 0,33        | 2,90E-02        | 43        | 0,02        | 0,58        |      |          |    |      |      |  |  |  |
| Bromodomain-containing protein 4                             | BRD4         |      |          |     |      |      |             |                 |           |             |             | 0,77 | 8,88E-03 | 10 | 0,18 | 0,95 |  |  |  |

Note: \* the complete UniProt Name of proteins includes also the suffix “\_HUMAN”.

**Table S5.** 138 DrugBank ligands identified from the similarity calculations together with their ChEMBL IDs.

| DrugBank ID | ChEMBL ID     | CAS Number  | Name                                                                                     |
|-------------|---------------|-------------|------------------------------------------------------------------------------------------|
| DB00210     | CHEMBL1265    | 106685-40-9 | Adapalene                                                                                |
| DB00406     | CHEMBL459265  | 7438-46-2   | Gentian violet cation                                                                    |
| DB00432     | CHEMBL1129    | 70-00-8     | Trifluridine                                                                             |
| DB00518     | CHEMBL1483    | 54965-21-8  | Albendazole                                                                              |
| DB00555     | CHEMBL741     | 84057-84-1  | Lamotrigine                                                                              |
| DB00928     | CHEMBL1489    | 320-67-2    | Azacitidine                                                                              |
| DB01157     | CHEMBL119     | 52128-35-5  | Trimetrexate                                                                             |
| DB01958     | CHEMBL329985  |             | 5-[4-Tert-Butylphenylsulfanyl]-2,4-Quinazolinediamine                                    |
| DB02026     | CHEMBL104829  |             | Furo[2,3d]Pyrimidine Antifolate                                                          |
| DB02104     | CHEMBL50514   |             | 2,4-Diamino-5-Methyl-6-[(3,4,5-Trimethoxy-N-Methylanilino)Methyl]Pyrido[2,3-D]Pyrimidine |
| DB02152     | CHEMBL281948  | 97161-97-2  | K-252a                                                                                   |
| DB02240     | CHEMBL1190232 | 64046-79-3  | Quinacrine mustard                                                                       |
| DB02256     | CHEMBL353955  | 951-78-0    | 2'-Deoxyuridine                                                                          |
| DB02281     | CHEMBL471524  | 6742-12-7   | Formycin                                                                                 |
| DB02282     | CHEMBL277041  | 2457-80-9   | 5'-S-methyl-5'-thioadenosine                                                             |
| DB02390     |               |             | 5-Bromo-N[2-(Dimethylamino)Ethyl]-9-Aminoacridine-4-Carboxamide                          |
| DB02427     | CHEMBL325434  |             | 2,4-Diamino-6-[N-(2',5'-Dimethoxybenzyl)-N-Methylamino]Quinazoline                       |
| DB02472     |               |             | 7,8-dihydroinosine                                                                       |
| DB02583     | CHEMBL32113   | 175354-76-4 | N6-(2,5-Dimethoxy-Benzyl)-N6-Methyl-Pyrido[2,3-D]Pyrimidine-2,4,6-Triamine               |
| DB02753     |               | 40093-99-0  | Selenoinosine                                                                            |
| DB02798     |               |             | Alpha-Methylene Adenosine Monophosphate                                                  |
| DB02842     | CHEMBL287038  |             | 9-amino-n-[3-(dimethylamino)propyl]acridine-4-carboxamide                                |
| DB02857     | CHEMBL375655  | 118-00-3    | Guanosine                                                                                |
| DB02896     | CHEMBL388931  | 342-69-8    | Methylthioinosine                                                                        |
| DB02933     | CHEMBL551561  |             | 5'-Deoxy-5'-(Methylthio)-Tubercidin                                                      |
| DB03034     | CHEMBL420937  | 100986-86-5 | D-Levofloxacin                                                                           |
| DB03060     |               |             | Sri-9662                                                                                 |



|         |               |             |                                                                                |
|---------|---------------|-------------|--------------------------------------------------------------------------------|
| DB03068 | CHEMBL504567  | 3690-10-6   | Zebularine                                                                     |
| DB03199 |               |             | 4-Methoxy-E-Rhodomyacin T                                                      |
| DB03351 | CHEMBL151958  |             | Sri-9439                                                                       |
| DB03480 | CHEMBL220467  |             | Brequinar Analog                                                               |
| DB03626 | CHEMBL94277   |             | 5-Methoxy-1,2-Dimethyl-3-(Phenoxymethyl)Indole-4,7-Dione                       |
| DB03671 | CHEMBL1153    | 1672-46-4   | Digoxigenin                                                                    |
| DB03716 | CHEMBL1212979 |             | 5'-Fluoro-5'-Deoxyadenosine                                                    |
| DB03735 | CHEMBL1234254 |             | 9-(2-Deoxy-Beta-D-Ribofuranosyl)-6-Methylpurine                                |
| DB03763 |               | 65358-15-8  | 5-methyl-2'-deoxypseudouridine                                                 |
| DB03765 | CHEMBL582887  | 85-94-9     | 2'-cytidylic acid                                                              |
| DB03804 | CHEMBL1231486 |             | 5-Bromothienyldeoxyuridine                                                     |
| DB03952 |               |             | 9-(6-deoxy-beta-D-allofuranosyl)-6-methylpurine                                |
| DB03986 |               |             | 6-methyl-formycin A                                                            |
| DB03987 | CHEMBL36245   |             | 2,4-Diamino-6-[N-(3',5'-Dimethoxybenzyl)-N-Methylamino]Pyrido[2,3-D]Pyrimidine |
| DB04011 |               |             | 2'-(4-Dimethylaminophenyl)-5-(4-Methyl-1-Piperazinyl)-2,5'-Bi-Benzimidazole    |
| DB04163 | CHEMBL100239  |             | 5-Phenylsulfanyl-2,4-Quinazolinediamine                                        |
| DB04306 | CHEMBL83547   |             | 5-[(4-Methylphenyl)Sulfanyl]-2,4-Quinazolinediamine                            |
| DB04385 | CHEMBL1231969 |             | 3-Deazacytidine                                                                |
| DB04440 | CHEMBL1399702 | 550-33-4    | Nebularine                                                                     |
| DB04441 | CHEMBL290077  | 146-78-1    | 2-Fluoroadenosine                                                              |
| DB04546 | CHEMBL202701  | 6736-58-9   | 3-Deazaadenosine                                                               |
| DB04604 | CHEMBL99203   | 24386-93-4  | 5-iodotubercidin                                                               |
| DB04616 | CHEMBL1082738 |             | TACRINE(8)-4-AMINOQUINOLINE                                                    |
| DB04662 | CHEMBL1094304 |             | OLOMOUCINE II                                                                  |
| DB04944 | CHEMBL1551724 | 2627-69-2   | Acadesine                                                                      |
| DB04954 | CHEMBL392149  | 204512-90-3 | Tecadenoson                                                                    |
| DB05585 | CHEMBL492399  | 827031-83-4 | Verubulin                                                                      |
| DB05616 |               | 238074-89-0 | 4'-Methylene-5,8,10-tridezaaminopterin                                         |
| DB05706 | CHEMBL3249110 | 628290-43-7 | 13-deoxydoxorubicin                                                            |
| DB06198 | CHEMBL105318  | 25526-93-6  | Alovudine                                                                      |

|         |               |             |                                                                                                                    |
|---------|---------------|-------------|--------------------------------------------------------------------------------------------------------------------|
| DB06263 | CHEMBL1186894 | 110267-81-7 | Amrubicin                                                                                                          |
| DB06420 |               | 92689-49-1  | Annamycin                                                                                                          |
| DB06433 | CHEMBL2105467 | 171176-43-5 | Tezacitabine                                                                                                       |
| DB06581 | CHEMBL404519  | 174022-42-5 | Bevirimat                                                                                                          |
| DB06721 | CHEMBL113051  | 292618-32-7 | Gimatecan                                                                                                          |
| DB06813 | CHEMBL1201746 | 146464-95-1 | Pralatrexate                                                                                                       |
| DB06896 | CHEMBL509101  |             | 1-(4-fluorophenyl)-N-[3-fluoro-4-(1H-pyrrolo[2,3-b]pyridin-4-yloxy)phenyl]-2-oxo-1,2-dihydropyridine-3-carboxamide |
| DB06961 | CHEMBL398346  |             | 5-(5-chloro-2,4-dihydroxyphenyl)-N-ethyl-4-[4-(morpholin-4-ylmethyl)phenyl]isoxazole-3-carboxamide                 |
| DB07052 | CHEMBL195660  |             | 5'-S-ethyl-5'-thioadenosine                                                                                        |
| DB07153 | CHEMBL1230365 |             | 6-methyl-5-[3-methyl-3-(3,4,5-trimethoxyphenyl)but-1-yn-1-yl]pyrimidine-2,4-diamine                                |
| DB07226 |               |             | N-[4-(2-CHLOROPHENYL)-1,3-DIOXO-1,2,3,6-TETRAHYDROPYRROLO[3,4-C]CARBAZOL-9-YL]FORMAMIDE                            |
| DB07309 | CHEMBL212522  |             | 5-BROMO-2-{[(4-CHLOROPHENYL)SULFONYL]AMINO}BENZOIC ACID                                                            |
| DB07322 | CHEMBL380394  |             | 2-[(PHENYLSULFONYL)AMINO]-5,6,7,8-TETRAHYDRONAPHTHALENE-1-CARBOXYLIC ACID                                          |
| DB07423 | CHEMBL125236  | 401900-40-1 | Andarine                                                                                                           |
| DB07574 |               |             | 2-MERCAPTO-N-[1,2,3,10-TETRAMETHOXY-9-OXO-5,6,7,9-TETRAHYDRO-BENZO[A]HEPTALEN-7-YL]ACETAMIDE                       |
| DB07577 | CHEMBL22148   | 27653-49-2  | 2,4-Diamino-5-phenyl-6-ethylpyrimidine                                                                             |
| DB07638 | CHEMBL236718  |             | (3AS,4R,9BR)-2,2-DIFLUORO-4-(4-HYDROXYPHENYL)-1,2,3,3A,4,9B-HEXAHYDROCYCLOPENTA[C]CHROMEN-8-OL                     |
| DB07664 | CHEMBL261720  | 443798-47-8 | K-00546                                                                                                            |
| DB07678 |               |             | (9ALPHA,13BETA,17BETA)-2-[(1Z)-BUT-1-EN-1-YL]ESTRA-1,3,5(10)-TRIENE-3,17-DIOL                                      |
| DB07707 |               |             | (9BETA,11ALPHA,13ALPHA,14BETA,17ALPHA)-11-(METHOXYMETHYL)ESTRA-1(10),2,4-TRIENE-3,17-DIOL                          |
| DB07769 | CHEMBL124718  |             | S-3-(4-FLUOROPHENOXY)-2-HYDROXY-2-METHYL-N-[4-NITRO-3-(TRIFLUOROMETHYL)PHENYL]PROPANAMIDE                          |
| DB07791 |               |             | 4-{[4-(1-CYCLOPROPYL-2-METHYL-1H-IMIDAZOL-5-YL)PYRIMIDIN-2-YL]AMINO}-N-METHYLBENZENESULFONAMIDE                    |
| DB07810 | CHEMBL45068   | 60-82-2     | Phloretin                                                                                                          |
| DB07812 |               |             | N-[(1S)-2-amino-1-phenylethyl]-5-(1H-pyrrolo[2,3-b]pyridin-4-yl)thiophene-2-carboxamide                            |
| DB07877 | CHEMBL383189  |             | 8-(6-BROMO-BENZO[1,3]DIOXOL-5-YLSULFANYL)-9-(3-ISOPROPYLAMINO-PROPYL)-ADENINE                                      |
| DB08141 | CHEMBL1187319 |             | 4-{[(2,6-difluorophenyl)carbonyl]amino}-N-[(3S)-piperidin-3-yl]-1H-pyrazole-3-carboxamide                          |
| DB08362 | CHEMBL230354  |             | N-(3-(8-CYANO-4-(PHENYLAMINO)PYRAZOLO[1,5-A][1,3,5]TRIAZIN-2-YLAMINO)PHENYL)ACETAMIDE                              |
| DB08471 | CHEMBL1235660 |             | 1-(thiophen-2-ylacetyl)-4-(3-thiophen-2-yl-1,2,4-oxadiazol-5-yl)piperidine                                         |
| DB08473 | CHEMBL375530  | 53-85-0     | Dichlororibofuranosylbenzimidazole                                                                                 |
| DB08541 |               |             | [(3S)-9-hydroxy-1-methyl-10-oxo-4,10-dihydro-3H-benzo[g]isochromen-3-yl]acetic acid                                |

|         |               |              |                                                                                   |
|---------|---------------|--------------|-----------------------------------------------------------------------------------|
| DB08737 |               |              | (3AS,4R,9BR)-4-(4-HYDROXYPHENYL)-1,2,3,3A,4,9B-HEXAHYDROCYCLOPENTA[C]CHROMEN-9-OL |
| DB08878 | CHEMBL376180  | 54-62-6      | Aminopterin                                                                       |
| DB08974 | CHEMBL1454946 | 31430-15-6   | Flubendazole                                                                      |
| DB11279 | CHEMBL1589793 | 18198-35-1   | Brilliant green cation                                                            |
| DB11410 | CHEMBL37161   | 43210-67-9   | Fenbendazole                                                                      |
| DB11472 | CHEMBL1371412 | 61570-90-9   | Tioxidazole                                                                       |
| DB11491 | CHEMBL37858   | 98105-99-8   | Sarafloxacin                                                                      |
| DB11562 | CHEMBL417990  | 485-49-4     | Bicuculline                                                                       |
| DB11648 | CHEMBL2219422 | 1047644-62-1 | Afuresertib                                                                       |
| DB11674 | CHEMBL198877  | 531-95-3     | Equol                                                                             |
| DB11872 | CHEMBL257662  | 219923-05-4  | ZD-6126                                                                           |
| DB11881 | CHEMBL399583  | 747412-64-2  | AUY922                                                                            |
| DB11925 | CHEMBL2336325 | 1009298-59-2 | Vistusertib                                                                       |
| DB11933 | CHEMBL452867  | 7724-76-7    | Riboprine                                                                         |
| DB12156 | CHEMBL305686  | 73-03-0      | Cordycepin                                                                        |
| DB12185 | CHEMBL1614650 | 171335-80-1  | Exatecan                                                                          |
| DB12222 | CHEMBL305666  | 149882-10-0  | Lurtotecan                                                                        |
| DB12234 | CHEMBL351706  | 195987-41-8  | BMS-214662                                                                        |
| DB12350 | CHEMBL2068971 | 156722-18-8  | Rostafuroxin                                                                      |
| DB12359 | CHEMBL467399  | 848695-25-0  | BIIB021                                                                           |
| DB12459 | CHEMBL2111084 | 256411-32-2  | Belotecan                                                                         |
| DB12570 | CHEMBL3586404 | 1228013-30-6 | CC-223                                                                            |
| DB12586 |               | 38390-45-3   | Anhydrovinblastine                                                                |
| DB12802 | CHEMBL283120  | 477-47-4     | Picropodophyllin                                                                  |
| DB12843 | CHEMBL1075789 | 465-16-7     | Oleandrin                                                                         |
| DB12901 | CHEMBL272557  | 69123-90-6   | Fiacitabine                                                                       |
| DB12925 | CHEMBL2103852 | 1000852-17-4 | Crolibulin                                                                        |
| DB12957 | CHEMBL1076257 | 10356-76-0   | 5-fluoro-2'-deoxycytidine                                                         |
| DB12986 | CHEMBL3393066 | 1246560-33-7 | VS-5584                                                                           |
| DB13011 | CHEMBL77101   | 119422-08-1  | Diethylhomospermine                                                               |

|         |               |              |                                |
|---------|---------------|--------------|--------------------------------|
| DB13103 |               | 236095-29-7  | GPX-150                        |
| DB13304 | CHEMBL313302  | 68-76-8      | Triaziquone                    |
| DB13318 | CHEMBL312862  | 477-30-5     | Demecolcine                    |
| DB13465 | CHEMBL1788401 | 31431-43-3   | Ciclobendazole                 |
| DB13611 | CHEMBL152649  | 3689-76-7    | Chlormidazole                  |
| DB13756 | CHEMBL1075790 | 1182-87-2    | Peruvoside                     |
| DB13776 | CHEMBL2104340 | 611-53-0     | Ibacinabine                    |
| DB13865 | CHEMBL1697741 | 4914-30-1    | Dehydroemetine                 |
| DB13921 | CHEMBL438605  | 20724-73-6   | 2'-C-methylcytidine            |
| DB14025 | CHEMBL278255  | 105956-97-6  | Clinafloxacin                  |
| DB14122 | CHEMBL378104  | 19309-14-9   | Dihydroxymethoxychalcone       |
| DB14178 | CHEMBL571700  | 97-74-5      | Tetramethylthiuram monosulfide |
| DB14846 | CHEMBL4084907 | 1225037-39-7 | Bimiralisib                    |
| DB14930 |               | 287114-80-1  | Alovudine F-18                 |
| DB14933 | CHEMBL438497  | 1341-23-7    | Nicotinamide riboside          |
| DB15273 | CHEMBL3040440 | 1061353-68-1 | VS-4718                        |
| DB15590 | CHEMBL330498  | 477-52-1     | beta-Apopicropodophyllin       |
| DB15653 | CHEMBL517231  | 865363-93-5  | Islatravir                     |
| DB16070 | CHEMBL4297468 | 1629677-75-3 | KZR-616                        |
| DB16071 |               | 184302-49-6  | FF-10502                       |
| DB16103 | CHEMBL79280   | 195533-53-0  | Batabulin                      |
| DB16407 | CHEMBL519846  | 1011529-10-4 | Azvudine                       |

---

**Table S6.** 48 DrugBank ligands that are more similar to molecules of the ChEMBL dataset. The table includes fingerprint values, activity value on PC cell lines of the most similar molecule, and total number of similarities identified.

| DrugBank ID | Most similar ChEMBL molecule | MACCS | ECFP4 | Tanimoto Combo | Shape Tanimoto | Color Tanimoto | Most similar molecule with activity on PC-3 | Most similar molecule with activity on LNCaP | Most similar molecule with activity on DU-145 | N° of similar molecules |
|-------------|------------------------------|-------|-------|----------------|----------------|----------------|---------------------------------------------|----------------------------------------------|-----------------------------------------------|-------------------------|
| DB08878     | CHEMBL1982461                | 0,897 | 0,882 | 1,98           | 0,98           | 1              | GI50 = 118.03 nM                            |                                              | GI50 = 10.0 nM                                | 1                       |
| DB13318     | CHEMBL425414                 | 0,814 | 0,9   | 1,979          | 0,979          | 1              | IC50 = 17.6 nM                              |                                              |                                               | 6                       |
| DB07638     | CHEMBL278703                 | 0,885 | 0,704 | 1,948          | 0,951          | 0,997          | EC50 = 0.66 nM                              |                                              |                                               | 2                       |
| DB00210     | CHEMBL1180                   | 0,885 | 0,844 | 1,913          | 0,982          | 0,931          | IC50 = 430.0 nM                             | IC50 = 320.0 nM                              | IC50 = 280.0 nM                               | 2                       |
| DB16071     | CHEMBL555748                 | 0,912 | 1     | 1,898          | 0,978          | 0,92           | IC50 = 580.0 nM                             |                                              |                                               | 2                       |
| DB13756     | CHEMBL501533                 | 1     | 0,903 | 1,894          | 0,98           | 0,914          | GI50 = 0.7244 nM                            |                                              | GI50 = 0.1 nM                                 | 4                       |
| DB14846     | CHEMBL2017974                | 1     | 1     | 1,87           | 0,976          | 0,894          |                                             |                                              | IC50 = 910.0 nM                               | 1                       |
| DB06721     | CHEMBL112769                 | 0,984 | 0,886 | 1,849          | 0,982          | 0,867          | IC50 = 15.0 nM                              |                                              |                                               | 8                       |
| DB13011     | CHEMBL551695                 | 0,862 | 0,5   | 1,846          | 0,928          | 0,918          |                                             |                                              | IC50 = 60.0 nM                                | 3                       |
| DB08974     | CHEMBL1981545                | 0,886 | 0,846 | 1,827          | 0,934          | 0,894          | GI50 = 348.34 nM                            |                                              |                                               | 2                       |
| DB04441     | CHEMBL1750                   | 0,917 | 1     | 1,825          | 0,958          | 0,867          | GI50 = 63.0 nM                              |                                              | GI50 = 125.0 nM                               | 14                      |
| DB05585     | CHEMBL1275943                | 0,912 | 0,692 | 1,818          | 0,979          | 0,838          | GI50 = 509.0 nM                             |                                              | GI50 = 269.0 nM                               | 1                       |
| DB16103     | CHEMBL446353                 | 0,891 | 0,842 | 1,811          | 0,977          | 0,833          | GI50 = 468.0 nM                             |                                              |                                               | 2                       |
| DB00555     | CHEMBL264373                 | 0,879 | 0,667 | 1,793          | 0,91           | 0,883          | GI50 = 78.52 nM                             |                                              |                                               | 1                       |
| DB11648     | CHEMBL3137336                | 0,811 | 0,9   | 1,789          | 0,964          | 0,825          |                                             | IC50 = 70.0 nM                               |                                               | 1                       |
| DB11410     | CHEMBL1707859                | 0,837 | 0,679 | 1,753          | 0,918          | 0,835          | GI50 = 91.41 nM                             |                                              | GI50 = 309.03 nM                              | 2                       |
| DB06263     | CHEMBL178                    | 0,852 | 0,886 | 1,73           | 0,95           | 0,78           | IC50 = 26.0 nM                              | IC50 = 100.0 nM                              | IC50 = 24.5 nM                                | 2                       |
| DB06420     | CHEMBL1992472                | 0,833 | 0,889 | 1,702          | 0,933          | 0,769          | GI50 = 273.53 nM                            |                                              | GI50 = 29.44 nM                               | 1                       |
| DB12185     | CHEMBL1970399                | 0,877 | 0,705 | 1,7            | 0,913          | 0,786          | GI50 = 21.38 nM                             |                                              | GI50 = 10.0 nM                                | 11                      |
| DB12925     | CHEMBL1403937                | 0,811 | 0,885 | 1,694          | 0,961          | 0,733          | GI50 = 462.0 nM                             |                                              | GI50 = 637.0 nM                               | 3                       |
| DB11925     | CHEMBL4239712                | 0,932 | 0,889 | 1,679          | 0,909          | 0,77           | IC50 = 110.0 nM                             |                                              |                                               | 1                       |
| DB00928     | CHEMBL2064455                | 0,8   | 0,552 | 1,676          | 0,93           | 0,746          | IC50 = 630.0 nM                             |                                              |                                               | 1                       |
| DB01157     | CHEMBL1965053                | 0,878 | 0,955 | 1,667          | 0,883          | 0,784          |                                             |                                              | GI50 = 717.79 nM                              | 4                       |
| DB03068     | CHEMBL888                    | 0,852 | 0,571 | 1,657          | 0,944          | 0,713          | IC50 = 2.6 nM                               | IC50 = 512.0 nM                              | IC50 = 3.5 nM                                 | 1                       |
| DB14122     | CHEMBL268838                 | 0,8   | 0,344 | 1,652          | 0,875          | 0,777          |                                             |                                              | GI50 = 330.0 nM                               | 1                       |
| DB07810     | CHEMBL268838                 | 1     | 0,652 | 1,642          | 0,893          | 0,75           |                                             |                                              | GI50 = 330.0 nM                               | 1                       |
| DB15273     | CHEMBL3393272                | 0,846 | 0,722 | 1,64           | 0,925          | 0,716          | IC50 = 270.0 nM                             |                                              |                                               | 1                       |
| DB12459     | CHEMBL276820                 | 0,844 | 0,775 | 1,636          | 0,85           | 0,786          |                                             |                                              | GI50 = 17.99 nM                               | 11                      |
| DB00518     | CHEMBL9514                   | 0,816 | 0,679 | 1,629          | 0,929          | 0,701          |                                             |                                              | IC50 = 250.0 nM                               | 1                       |
| DB12843     | CHEMBL510771                 | 0,978 | 0,968 | 1,627          | 0,916          | 0,712          | GI50 = 25.59 nM                             |                                              | GI50 = 17.58 nM                               | 1                       |
| DB12234     | CHEMBL1738728                | 0,853 | 0,806 | 1,599          | 0,882          | 0,718          |                                             |                                              | IC50 = 70.0 nM                                | 1                       |
| DB11562     | CHEMBL4644492                | 0,938 | 0,794 | 1,598          | 0,884          | 0,714          | IC50 = 1000.0 nM                            |                                              |                                               | 1                       |
| DB08473     | CHEMBL236070                 | 0,82  | 0,594 | 1,587          | 0,788          | 0,8            | IC50 = 900.0 nM                             |                                              |                                               | 1                       |
| DB02152     | CHEMBL603469                 | 0,852 | 0,833 | 1,583          | 0,902          | 0,681          |                                             |                                              |                                               | 3                       |
| DB07664     | CHEMBL191003                 | 0,883 | 0,655 | 1,583          | 0,88           | 0,703          | IC50 = 120.0 nM                             |                                              |                                               | 4                       |
| DB12802     | CHEMBL1411422                | 0,805 | 0,543 | 1,573          | 0,893          | 0,68           | GI50 = 33.11 nM                             |                                              | GI50 = 25.64 nM                               | 3                       |
| DB02282     | CHEMBL1814776                | 0,847 | 0,636 | 1,571          | 0,908          | 0,664          | GI50 = 11.0 nM                              |                                              |                                               | 1                       |

|                |               |       |       |       |       |       |                 |                  |   |
|----------------|---------------|-------|-------|-------|-------|-------|-----------------|------------------|---|
| <b>DB12986</b> | CHEMBL2314287 | 0,902 | 0,447 | 1,561 | 0,874 | 0,686 | IC50 = 120.0 nM |                  | 2 |
| <b>DB11872</b> | CHEMBL1985898 | 0,812 | 0,9   | 1,556 | 0,94  | 0,616 | GI50 = 25.06 nM | GI50 = 18.49 nM  | 1 |
| <b>DB12156</b> | CHEMBL236070  | 0,82  | 0,514 | 1,55  | 0,844 | 0,705 | IC50 = 900.0 nM |                  | 3 |
| <b>DB06433</b> | CHEMBL555748  | 0,823 | 0,679 | 1,548 | 0,897 | 0,651 | IC50 = 580.0 nM |                  | 1 |
| <b>DB11674</b> | CHEMBL278703  | 0,846 | 0,56  | 1,532 | 0,873 | 0,659 | EC50 = 0.66 nM  |                  | 1 |
| <b>DB04944</b> | CHEMBL4284518 | 0,85  | 0,342 | 1,522 | 0,893 | 0,629 | GI50 = 808.0 nM | GI50 = 562.34 nM | 3 |
| <b>DB12222</b> | CHEMBL1979572 | 0,831 | 0,702 | 1,52  | 0,853 | 0,667 | GI50 = 22.91 nM | GI50 = 10.0 nM   | 1 |
| <b>DB06813</b> | CHEMBL308279  | 0,842 | 0,732 | 1,519 | 0,913 | 0,606 | GI50 = 52.72 nM | GI50 = 1000.0 nM | 1 |
| <b>DB12359</b> | CHEMBL3891745 | 0,98  | 0,759 | 1,518 | 0,772 | 0,746 | GI50 = 610.0 nM | GI50 = 870.96 nM | 1 |
| <b>DB12570</b> | CHEMBL3586565 | 0,859 | 0,743 | 1,513 | 0,884 | 0,629 | IC50 = 38.0 nM  |                  | 1 |

---

**Table S7.** DrugBank ligands with reported activity on PC cell lines identified from the similarity screening, which did not result as particularly promising for repurposing on PC according to the performed analyses and literature data.

| Molecule Name      | 2D structure                                                                        | Activity <i>in vitro</i>                                                            | Activity <i>in vivo</i> | Max phase | Clinical trial /Patent   | Disease                                                                            | Primary target                                   |
|--------------------|-------------------------------------------------------------------------------------|-------------------------------------------------------------------------------------|-------------------------|-----------|--------------------------|------------------------------------------------------------------------------------|--------------------------------------------------|
| <b>Zebularine</b>  | 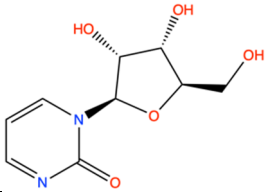   | Doubling time of PC-3 cells is almost doubled 39hrs to 59hrs                        |                         | 0         |                          |                                                                                    |                                                  |
| <b>Gimatecan</b>   |    | IC50 = 0.0026µg/ml (PC-3);<br>IC50 = 0.0034 µg/ml (DU-145)                          |                         | 2         |                          | Breast cancer (Phase 2)                                                            | DNA topoisomerase I (TOP1) [Inhibitor]           |
| <b>Lurtotecan</b>  |    | IC50 = 1.61 ng/ml (DU-145);<br>IC50 = 0.44 ng/ml for liposomal formulation (DU-145) |                         | 2         |                          | Ovarian cancer (Discontinued in Phase 2);<br>Lung cancer (Discontinued in Phase 1) | DNA topoisomerase I (TOP1) [Inhibitor]           |
| <b>Belotecan</b>   |   |                                                                                     |                         |           | Phase I on 2 PC patients | Solid tumour/cancer (Phase 2)                                                      | DNA topoisomerase I (TOP1) [Inhibitor]           |
| <b>Demecolcine</b> |  | Activity = 31 nM (PC-3)                                                             |                         | 0         |                          | Solid tumour/cancer (Approved)                                                     | Microtubule-associated protein (MAP) [Modulator] |

|                                                 |                                                                                     |                                                                                   |   |                          |                                                                                                                                         |                                                                                                                                                  |
|-------------------------------------------------|-------------------------------------------------------------------------------------|-----------------------------------------------------------------------------------|---|--------------------------|-----------------------------------------------------------------------------------------------------------------------------------------|--------------------------------------------------------------------------------------------------------------------------------------------------|
| <b>Verubulin</b>                                | 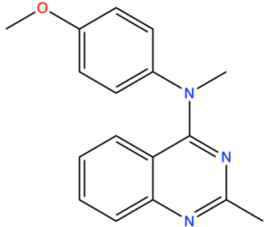   |                                                                                   | 2 | Phase I on 3 PC patients | Solid tumour/cancer (Phase 2);<br>Brain metastases (Phase 2);<br>Glioblastoma multiforme (Phase 2);<br>Recurrent glioblastoma (Phase 2) |                                                                                                                                                  |
| <b>K-00546</b>                                  |    | Tested on PC-3, (data not shown)                                                  | 0 |                          |                                                                                                                                         | Cyclin-dependent kinase 1 (CDK1) [Inhibitor];<br>Cyclin-dependent kinase 2 (CDK2) [Inhibitor];<br>VEGFR1 messenger RNA (VEGFR1 mRNA) [Inhibitor] |
| <b>Oleandrin</b>                                |    | IC <sub>50</sub> = 0.001 µg/ml (PC-3);<br>IC <sub>50</sub> = 0.002 µg/ml (DU-145) | 1 |                          | Solid tumour/cancer (Phase 2);<br>Pancreatic cancer (Phase 2)                                                                           | Sodium/potassium-transporting ATPase (SPT ATPase) [Inhibitor]                                                                                    |
| <b>Tezacitabine</b>                             |    | Cell viability decrease at 10µM (PC-3)                                            | 2 |                          | Gastric adenocarcinoma (Discontinued in Phase 2)                                                                                        | Ribonucleoside-diphosphate reductase M2 (RRM2) [Modulator]                                                                                       |
| <b>Dichlororibofuranosylbenzimidazole (DRB)</b> |   | Apoptotic effect on PC-3 cells cotreated with API-2                               | 0 |                          |                                                                                                                                         | Casein kinase II alpha (CSNK2A1) [Inhibitor]                                                                                                     |
| <b>Annamycin</b>                                |  | Tested on LNCaP-Pro5 cells, (data not shown)                                      | 1 |                          | Acute myeloid leukaemia (Phase 1/2)                                                                                                     | [DNA topoisomerase II alpha (TOP2A);<br>NaN]                                                                                                     |



|                                         |                                                                                     |                                                                                                 |   |                                                    |                                     |                                                                                                                                                                                                                                                           |
|-----------------------------------------|-------------------------------------------------------------------------------------|-------------------------------------------------------------------------------------------------|---|----------------------------------------------------|-------------------------------------|-----------------------------------------------------------------------------------------------------------------------------------------------------------------------------------------------------------------------------------------------------------|
| <b>K-252a</b>                           | 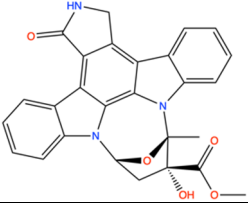   | Cell viability = 91% (PC-3), =94% (DU-145) at 100 nM                                            | 0 |                                                    | Solid tumour/cancer (Investigative) | [Protein kinase D (PRKD1); Inhibitor]                                                                                                                                                                                                                     |
| <b>4'-Thio-Fac (FF-10502)</b>           |    |                                                                                                 | 1 | Phase I 2 PC patients (NCT02661542)                | Solid tumour/cancer (Phase 1/2)     | [DNA polymerase beta (POLB); Inhibitor]                                                                                                                                                                                                                   |
| <b>5'-Deoxy-5'-methylthio adenosine</b> |    | Tumor volume 64% at 100mg/kg (MTA) + 75 mg/kg 6-TG (LTL352)                                     | 0 |                                                    | Multiple sclerosis (Terminated)     | Adenosine A2b receptor (ADORA2B) [Inhibitor];<br>Adenosine A2a receptor (ADORA2A) [Inhibitor];<br>Adenosine A1 receptor (ADORA1) [Inhibitor];<br>Adenosine A3 receptor (ADORA3) [Inhibitor];<br>S-methyl-5-thioadenosine phosphorylase (MTAP) [Inhibitor] |
| <b>ZD-6126</b>                          |   | Necrosis >80-90% at 200 mg/kg (PC-3)                                                            | 2 | Halted in phase II for toxic effects on humans     | Solid tumour/cancer (Phase 2)       |                                                                                                                                                                                                                                                           |
| <b>Diethylhomospermine (DEHSPM)</b>     |  | ID50 = 0.7 µM(PC-3);<br>ID50 = 0.03 µM(DU-145);<br>ID50 = 0.1 µM(LNCaP);<br>ID50 = 0.2µM(DuPro) | 1 | Phase I on 2 PC patients. Halted for toxic effects |                                     |                                                                                                                                                                                                                                                           |
| <b>Bicuculline</b>                      |  | Data not shown, inactive on PC-3, DU-145, LNCaP, MDA-PCA-2B                                     | 0 |                                                    |                                     | Gamma-aminobutyric acid receptor (GAR); [Antagonist];<br>Glutamate receptor AMPA (GRIA) [Antagonist]                                                                                                                                                      |

|                                                                                                            |   |                                                     |                                                     |                                                                                                   |
|------------------------------------------------------------------------------------------------------------|---|-----------------------------------------------------|-----------------------------------------------------|---------------------------------------------------------------------------------------------------|
| <b>Aminopterin</b> 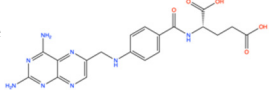       | 2 | PATENT<br>WO9818493A2                               | Leukaemia<br>(Withdrawn from market)                | Polypeptide deformylase (PDF) [Inhibitor]                                                         |
| <b>Batabulin</b>          | 2 | PATENT<br>WO2011057064A1                            | Solid tumour/cancer (Phase 2/3)                     |                                                                                                   |
| <b>2-Fluoroadenosine</b>  | 0 | PATENT<br>EP2711007                                 |                                                     |                                                                                                   |
| <b>AUY922</b>             | 0 | PATENT<br>EP2370076A2                               |                                                     |                                                                                                   |
| <b>Lamotrigine</b>       | 4 | Associated with PC<br>risk reduction                | Bipolar disorder (Approved);<br>Epilepsy (Approved) | Voltage-gated<br>sodium channel<br>alpha Nav1.9 (SCN11A) [Blocker]                                |
| <b>LY3201</b>           | 0 | Cellular proliferation<br>decrease from 1μM (LNCaP) |                                                     | Estrogen receptor beta (ESR2)<br>[Agonist];<br>Estrogen receptor alpha (ESR1)<br>[Agonist]        |
| <b>S-Equol</b>          | 2 | Cell viability decrease at<br>10μM (LNCaP)          | NCT00962390                                         | Hot flushes (Phase 2);<br>Alzheimer<br>(Phase 1/2)<br><br>Estrogen receptor beta (ESR2) [Agonist] |

|                     |                                                                                     |                                                                                           |   |                                                         |                                                                                                                                             |
|---------------------|-------------------------------------------------------------------------------------|-------------------------------------------------------------------------------------------|---|---------------------------------------------------------|---------------------------------------------------------------------------------------------------------------------------------------------|
| <b>Peruvoside</b>   | 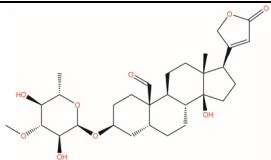   | Block of cell growth at 50nM (LNCaP-abl)                                                  | 0 |                                                         | Cardiac glycoside                                                                                                                           |
| <b>Acadesine</b>    |    | IC50 = 40-50 µM (PC-3, DU-145);<br>IC50 ~ 50 µM (LNCaP)                                   | 3 |                                                         | Diabetic complication (Phase 3) AMP-activated protein kinase (AMPK) [Modulator]                                                             |
| <b>Cordycepin</b>   |    | Cell viability decrease from 5µg/ml (PC-3; LNCaP), from 15µg/ml (DU-145)                  | 1 |                                                         |                                                                                                                                             |
| <b>Cardamonin</b>   |    | GI50 = 11.35 µg/ml (PC-3);<br>Cell proliferation = 60 % (DU-145), = 80 % (LNCaP) at 10 µM | 0 |                                                         |                                                                                                                                             |
| <b>Phloretin</b>    |    | IC50 = 25µM (LNCaP);<br>IC50 = 39.4 µM (PC-3)                                             | 0 |                                                         | Aquaporin-9 (AQP9) [Inhibitor];<br>Chloride channel protein 3 (CLC-3) [Blocker];<br>Solute carrier family 23 member 1 (SLC23A1) [Inhibitor] |
| <b>Crolibulin</b>   |   |                                                                                           | 1 | Phase I/II in combination with cisplatin<br>NCT01240590 | Solid tumour/cancer (Phase 1/2)                                                                                                             |
| <b>Fenbendazole</b> |  | ED50 = 1.82 µM (PC-3);<br>ED50 = 10.4 µM (DU-145)                                         | 0 | TCI = 91% with FBZ 100mg/kg (Dunning rat AT6.1)         |                                                                                                                                             |

|                     |                                                                                   |                                                                    |   |                                   |                                                                             |                                              |
|---------------------|-----------------------------------------------------------------------------------|--------------------------------------------------------------------|---|-----------------------------------|-----------------------------------------------------------------------------|----------------------------------------------|
| <b>Pralatrexate</b> | 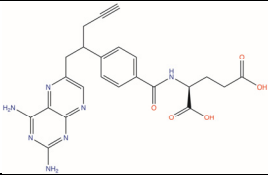 | $IC_{50} = 0.01 \mu M$ (PC-3);<br>$IC_{50} = 0.015 \mu M$ (DU-145) | 4 |                                   | Breast cancer<br>(Approved);<br>Peripheral T-cell<br>lymphoma<br>(Approved) | Polypeptide deformylase (PDF)<br>[Inhibitor] |
| <b>Amrubicin</b>    |  | Tested on PC-3 and LNCaP<br>(data not shown)                       | 3 | Case report on<br>small cell PC-3 | Small-cell lung<br>cancer (Phase 3)                                         |                                              |

**Table S8.** *In vitro* activity records on other tumor cell lines for the 10 candidates proposed for PC repurposing, retrieved from ChEMBL. Only activity data expressed by means of: (i) “Standard Type” equal to GI<sub>50</sub>, EC<sub>50</sub>, or IC<sub>50</sub>; (ii) “Standard Relation” equal to “=”, and; (iii) “Standard Unit” in the nanomolar range (i.e., “nM”) was retained.

| Drug                        | Disease                                      | Cell line  | Activity                   |
|-----------------------------|----------------------------------------------|------------|----------------------------|
| <b>Bimiralisib</b>          | Amelanotic melanoma                          | A2058      | IC <sub>50</sub> = 2333 nM |
|                             | Ovarian serous cystadenocarcinoma            | SKOV3      | IC <sub>50</sub> = 237 nM  |
| <b>Onatasertib (CC-223)</b> | Breast carcinoma                             | CAL-51     | IC <sub>50</sub> = 140 nM  |
|                             | Lung adenocarcinoma                          | A549       | IC <sub>50</sub> = 208 nM  |
|                             | Invasive breast carcinoma of no special type | T47D       | IC <sub>50</sub> = 92 nM   |
|                             | Lung large cell carcinoma                    | NCI-H460   | IC <sub>50</sub> = 200 nM  |
|                             | Hepatoblastoma                               | HepG2      | IC <sub>50</sub> = 321 nM  |
|                             | Breast adenocarcinoma                        | AU565      | IC <sub>50</sub> = 329 nM  |
|                             | Childhood hepatocellular carcinoma           | Hep3B      | IC <sub>50</sub> = 338 nM  |
|                             | Glioblastoma                                 | U87MG      | IC <sub>50</sub> = 555 nM  |
|                             | Colon carcinoma                              | HCT116     | IC <sub>50</sub> = 371 nM  |
|                             | Breast adenocarcinoma                        | MDA-MB-231 | IC <sub>50</sub> = 669 nM  |
|                             | Lung adenocarcinoma                          | NCI-H23    | IC <sub>50</sub> = 1039 nM |
| <b>VS-5584</b>              | Childhood acute monocytic leukemia           | MV4-11     | IC <sub>50</sub> = 200 nM  |
|                             | Invasive breast carcinoma of no special type | MCF7       | IC <sub>50</sub> = 130 nM  |
| <b>BIIB021</b>              | Invasive breast carcinoma of no special type | MCF7       | IC <sub>50</sub> = 100 nM  |
|                             | Colon carcinoma                              | HCT116     | GI <sub>50</sub> = 150 nM  |
|                             | Lung adenocarcinoma                          | NCI-H1975  | GI <sub>50</sub> = 200 nM  |
|                             | Lung large cell carcinoma                    | NCI-H460   | GI <sub>50</sub> = 210 nM  |
|                             | Childhood hepatocellular carcinoma           | Hep3B      | GI <sub>50</sub> = 240 nM  |
|                             | Breast adenocarcinoma                        | MDA-MB-231 | GI <sub>50</sub> = 240 nM  |
|                             | Lung adenocarcinoma                          | A549       | GI <sub>50</sub> = 260 nM  |
|                             | Breast adenocarcinoma                        | SK-BR-3    | GI <sub>50</sub> = 347 nM  |
|                             | Adult acute myeloid leukemia                 | HL60       | GI <sub>50</sub> = 590 nM  |
| <b>Adapalene (CD-271)</b>   | Colon adenocarcinoma                         | SW480      | IC <sub>50</sub> = 405 nM  |
|                             | Colon carcinoma                              | HCT116     | IC <sub>50</sub> = 597 nM  |
|                             | Colon adenocarcinoma                         | SNU-C1     | IC <sub>50</sub> = 1779 nM |
| <b>Picropodophyllin</b>     | Lung adenocarcinoma                          | A549       | IC <sub>50</sub> = 60 nM   |
| <b>VS-4718</b>              | Pancreatic ductal adenocarcinoma             | BXPC-3     | IC <sub>50</sub> = 930 nM  |
|                             | Lung adenocarcinoma                          | NCI-H1975  | IC <sub>50</sub> = 340 nM  |
|                             | Breast adenocarcinoma                        | MDA-MB-231 | IC <sub>50</sub> = 29 nM   |

## Distribution of activity for the PC-3, DU-145 and LNCaP

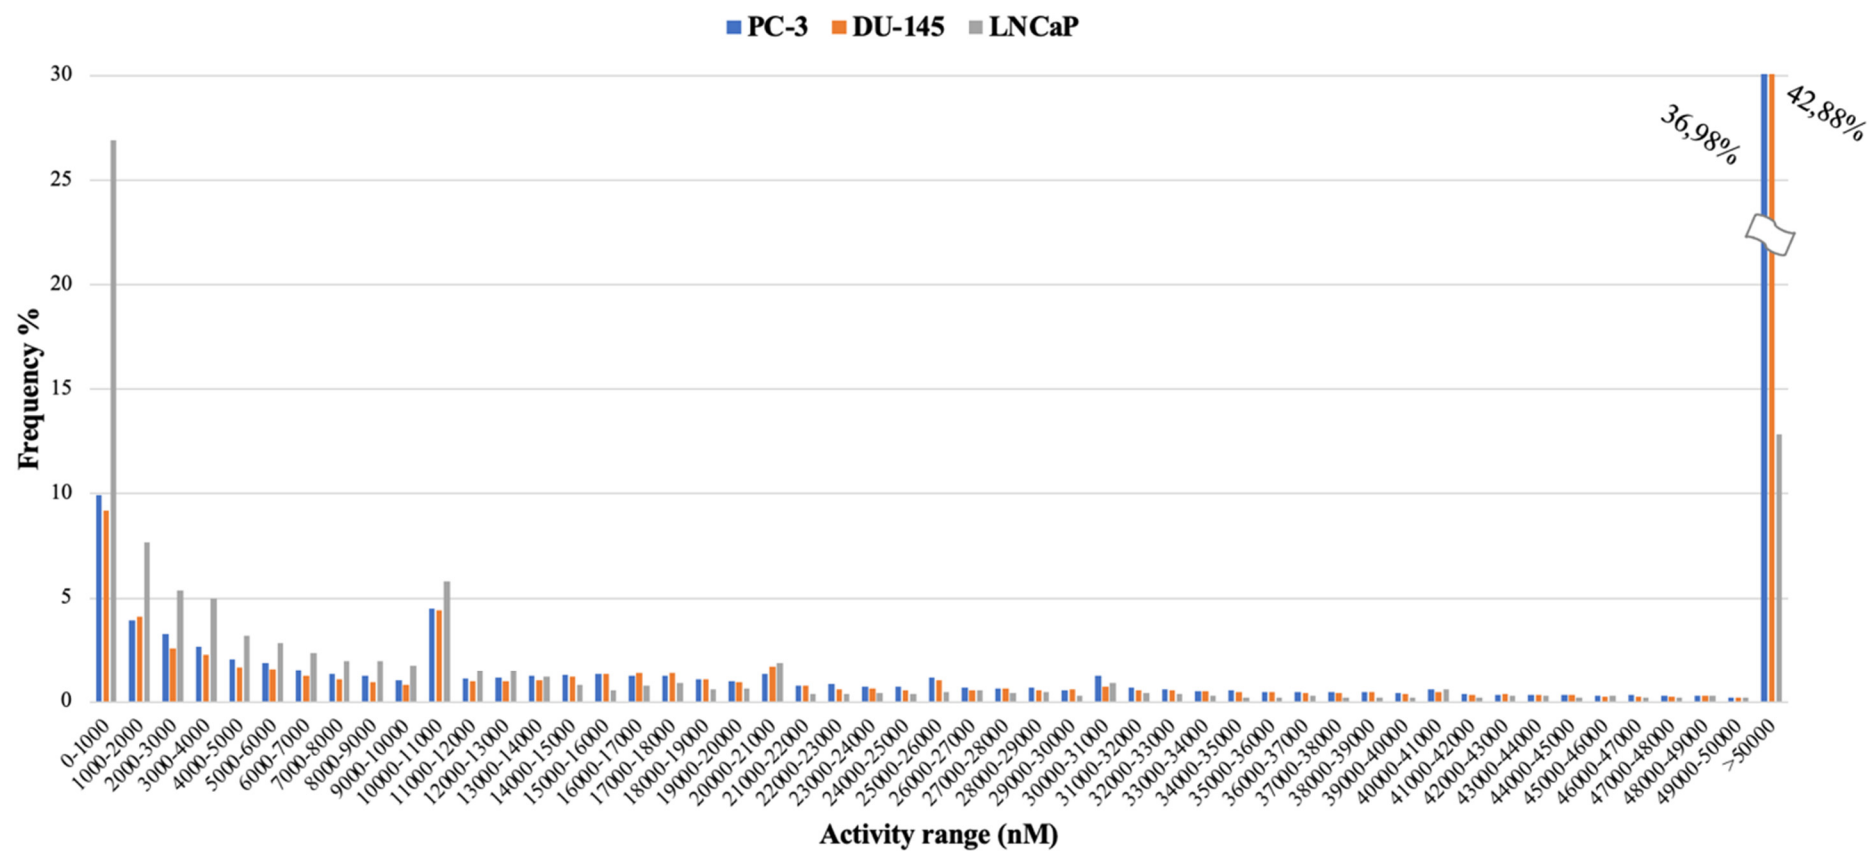

**Figure S1.** Activity values distribution for the molecules tested on PC-3, DU-145 and LNCaP PC cell lines reported on ChEMBL.

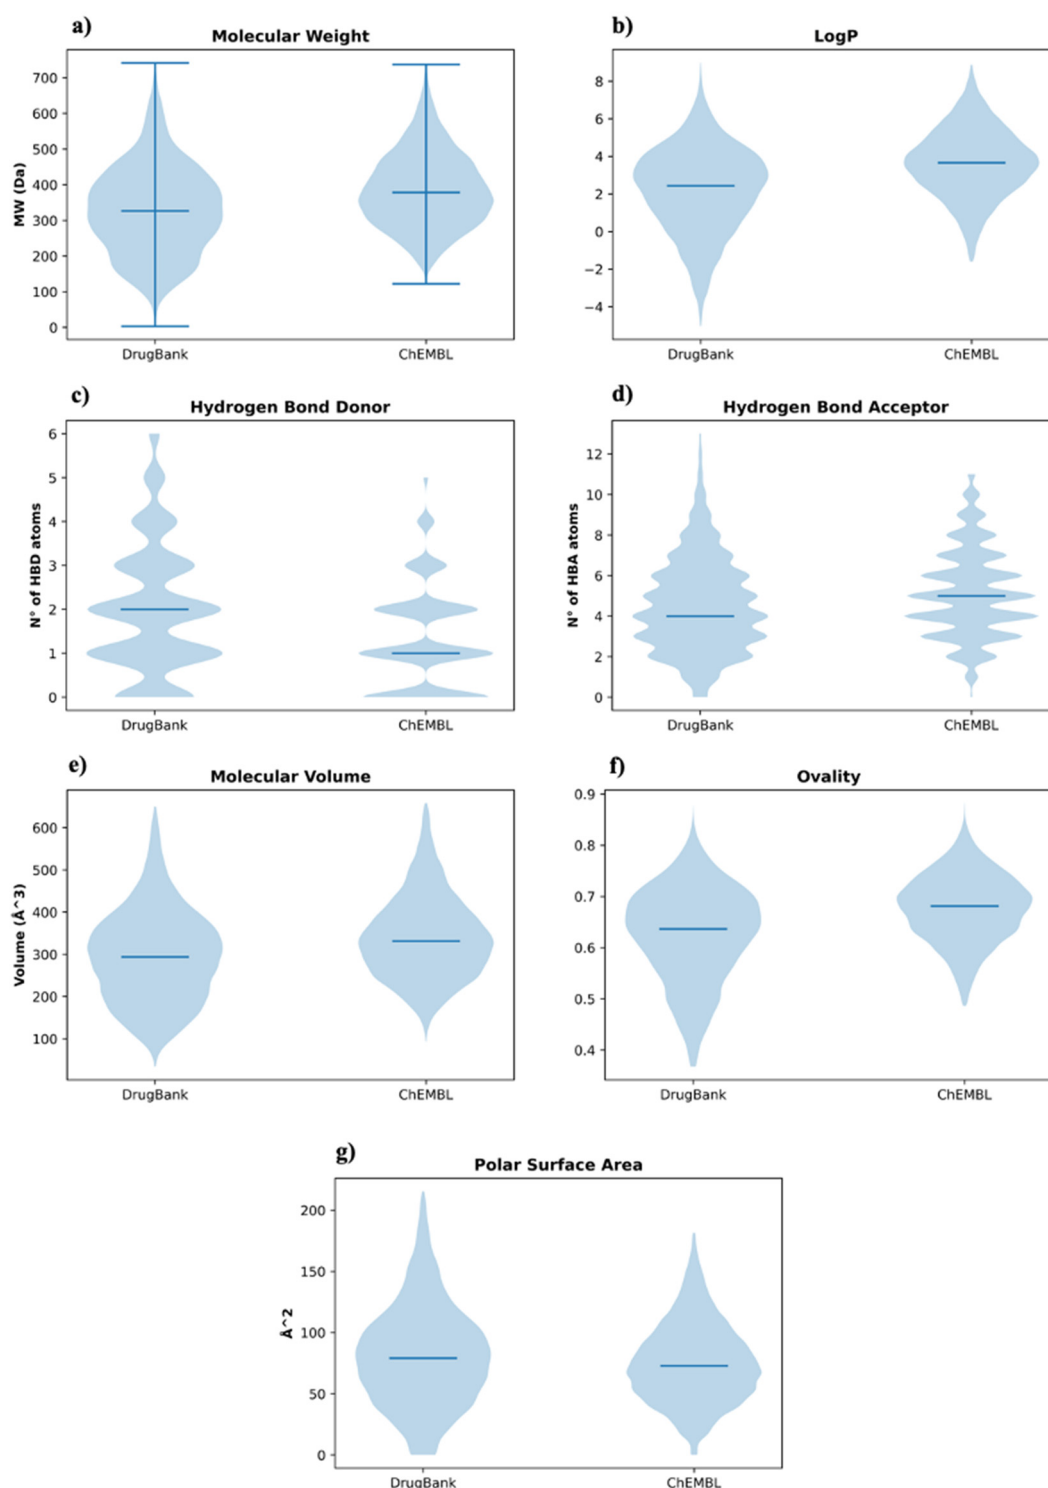

**Figure S2.** Distribution of molecular descriptors for the molecules of the DrugBank and ChEMBL datasets: **a)** molecular weight; **b)** LogP; **c)** Hydrogen bond donor atoms; **d)** Hydrogen bond acceptor atoms; **e)** molecular volume (VABC Volume); **f)** ovality; **g)** polar surface area. All molecular descriptors were calculated with KNIME nodes “RDKit Descriptor Calculation” and “CDK Molecular properties”. Ovality was obtained with the formula  $O = \frac{A}{4\pi(\frac{3V}{4\pi})^{2/3}}$ . Outliers below 1<sup>st</sup> quartile and above 3<sup>rd</sup> quartile were removed prior plots generation to highlight differences between the two datasets.

**Distribution of activity data for ChEMBL dataset among cell lines**

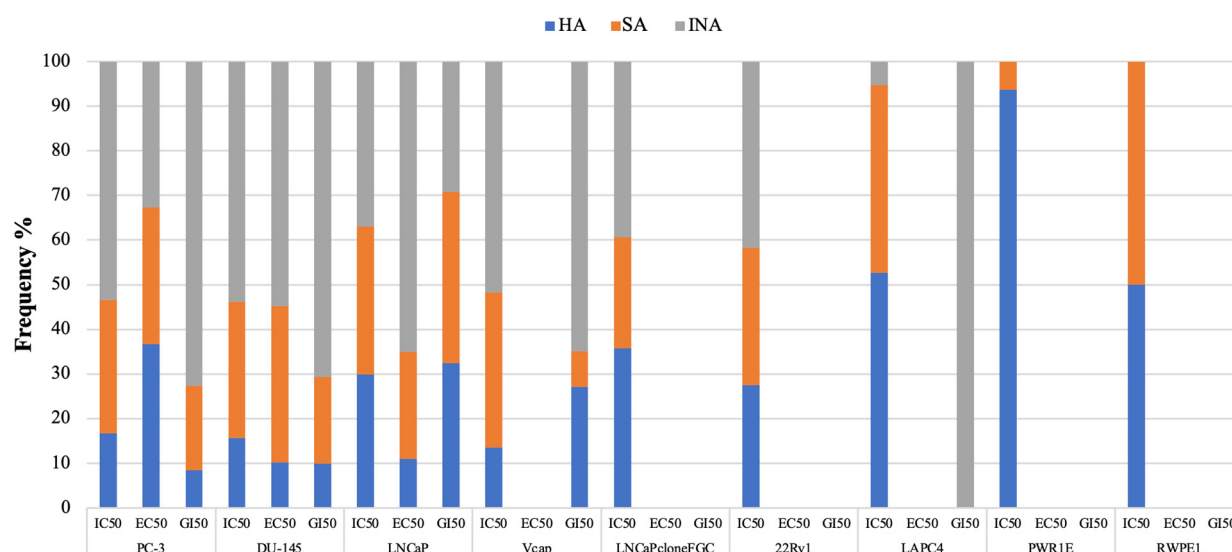

**Figure S3.** Bar plot of the activity data for the PC cell in the “*Standard Types*” IC<sub>50</sub>, EC<sub>50</sub>, or GI<sub>50</sub>. In this study, we considered: i) “*highly active*” molecules (HA), those with an activity value on PC cell lines below 1  $\mu$ M; ii) “*scarcely active*” molecules (LA) with activity values on PC cells higher than 1  $\mu$ M, and lower or equal to 10  $\mu$ M, and; iii) inactive molecules (INA) with activity values against PC cells higher than 10  $\mu$ M. Only the cell lines PC-3, DU-145, and LNCaP have activity records for all three “*Standard Types*” with comparable distribution of the records inside the considered ranges.



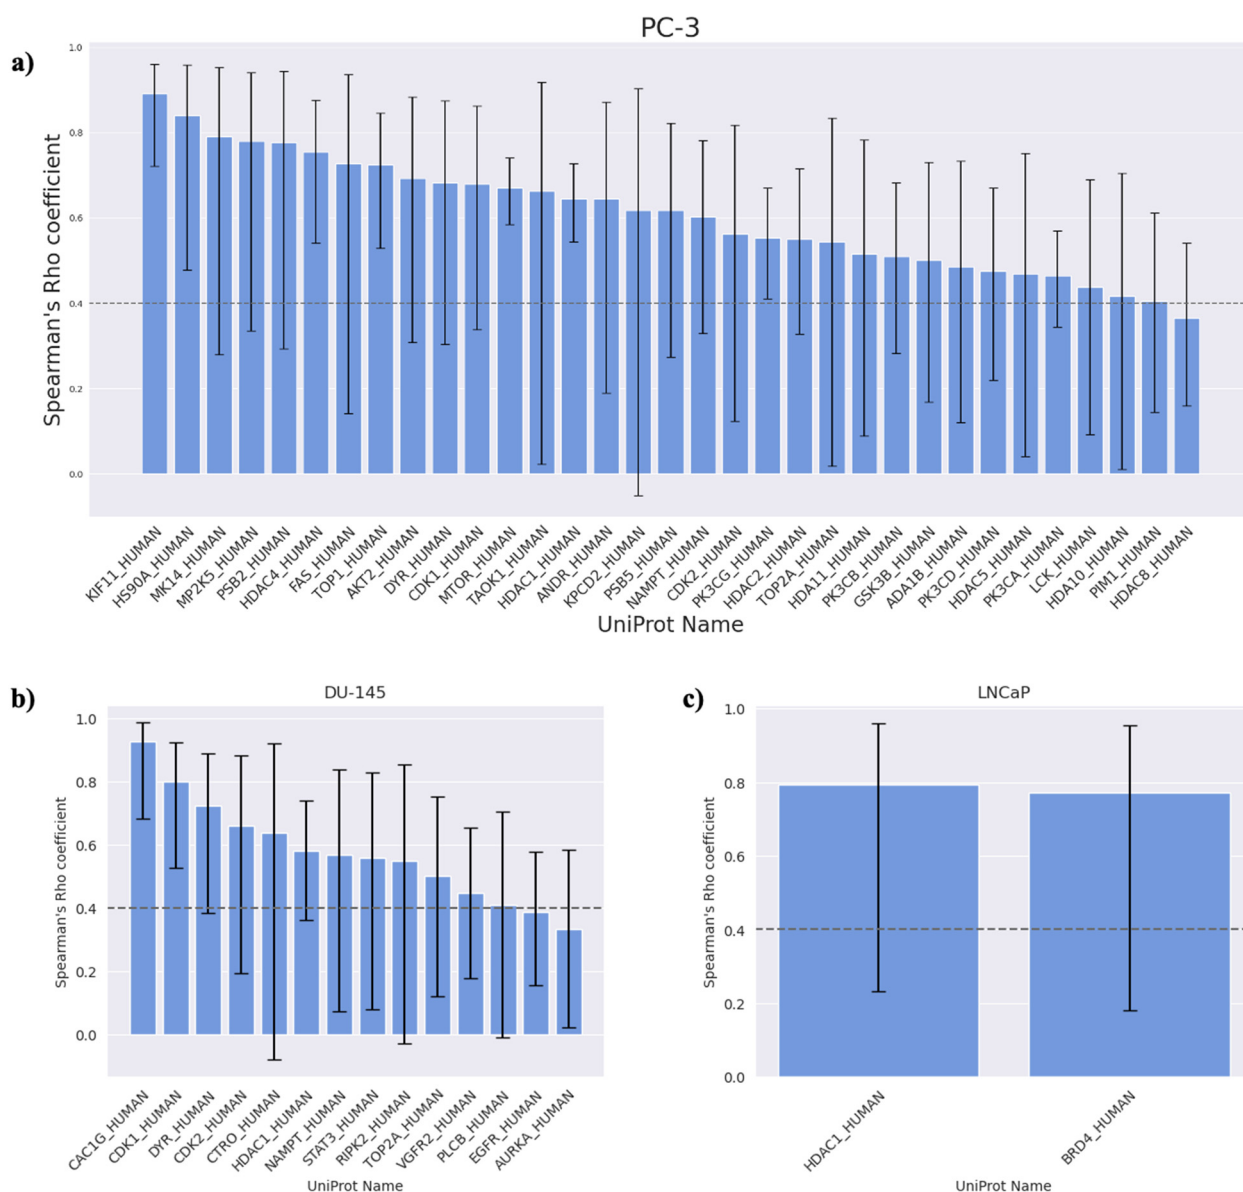

**Figure S4.** Evaluated Spearman's Rho correlation coefficient of correlation ( $\rho_s$ ) with their intervals of confidence. All  $p$ -values are  $< 0.05$  (see **Table S4**),  $\rho_s \geq 0.4$  was the threshold considered for an acceptable degree of correlation. The three panels represent the targets divided on the cell line of identification: **a)** PC-3, **b)** DU-145 and **c)** LNCaP cells.

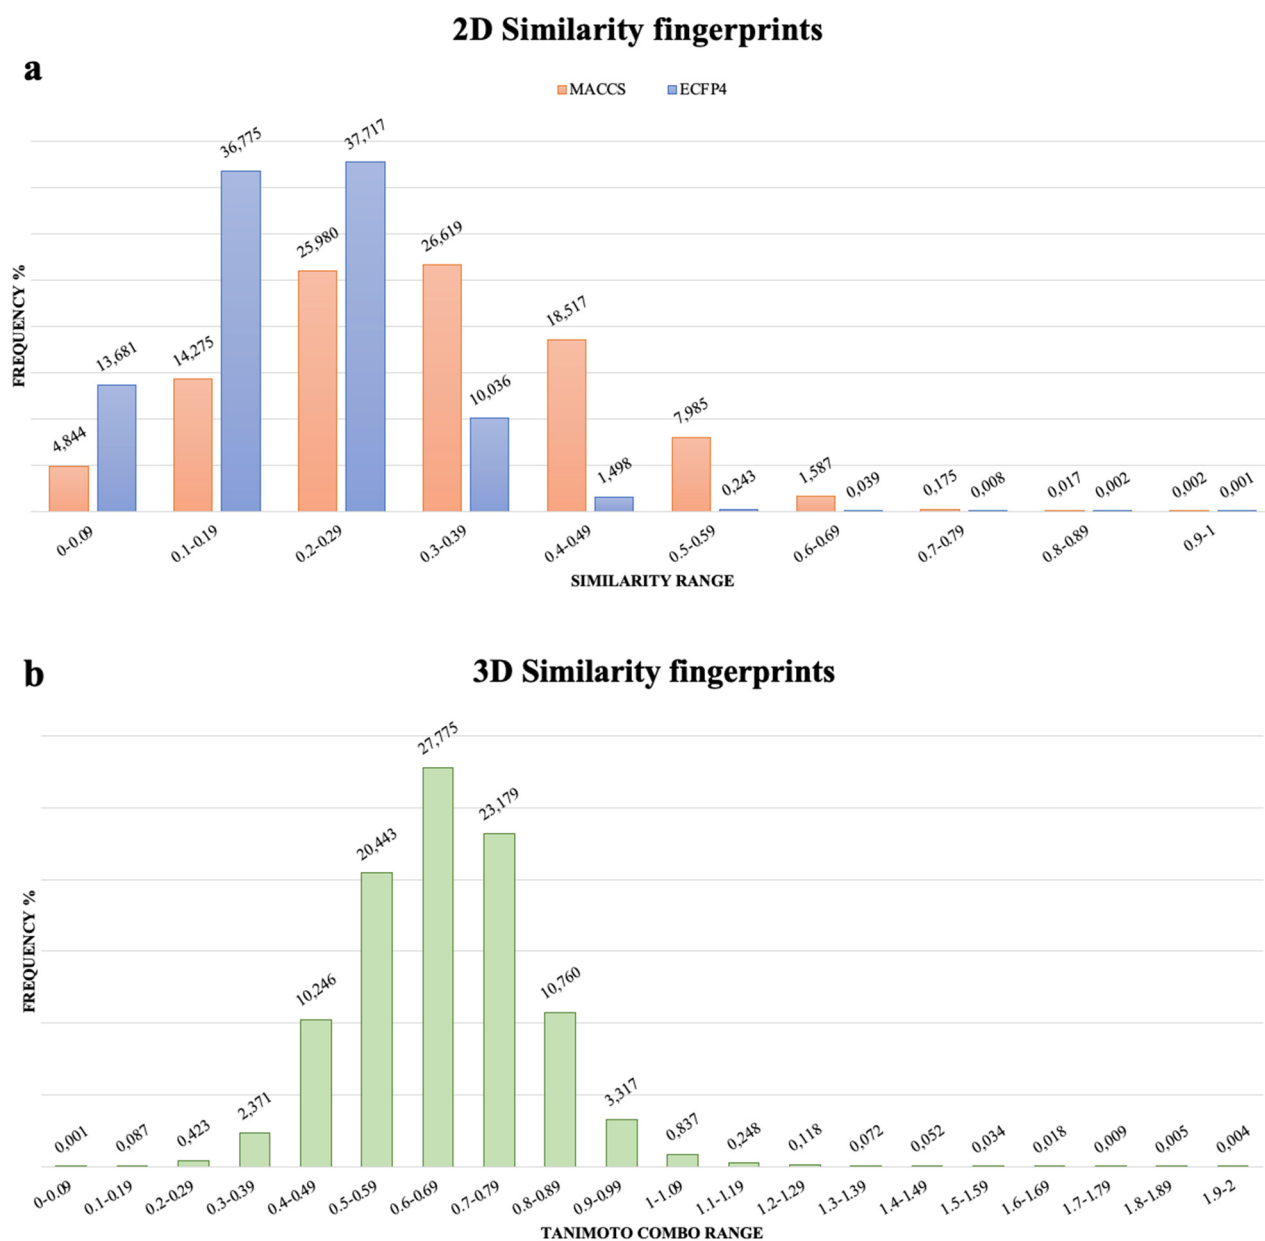

**Figure S5.** Frequency distributions of the estimated ligand-based similarities. In particular, panel **a**) reports the frequency distribution of the MACCS and ECFP4 fingerprints values obtained from the 2D similarity estimations on ChEMBL compounds versus DrugBank molecules. Panel **b**) reports the frequency distribution of the Tanimoto Combo scores, obtained at the 3D shape estimations performed on similar ChEMBL *versus* DrugBank molecules.
